# Supplementary material
Source: MDPI journal article supplement (https://www.mdpi.com/1424-8247/16/3/407)

**Supplement Table S1.** RSM design to maximize the extraction yield and improve the purity of AA from rosin.

| Run no. | The amount of HCl added<br>(mL; X <sub>1</sub> ) | The reflux extraction time<br>(min; X <sub>2</sub> ) | The amount of<br>ethanolamine added<br>(mL; X <sub>3</sub> ) |
|---------|--------------------------------------------------|------------------------------------------------------|--------------------------------------------------------------|
| 1       | 1.01                                             | 34.19                                                | 4.05                                                         |
| 2       | 2.49                                             | 75.81                                                | 4.05                                                         |
| 3       | 1.75                                             | 55.00                                                | 10.00                                                        |
| 4       | 2.49                                             | 75.81                                                | 15.95                                                        |
| 5       | 3.00                                             | 55.00                                                | 10.00                                                        |
| 6       | 1.75                                             | 55.00                                                | 20.00                                                        |
| 7       | 1.75                                             | 90.00                                                | 10.00                                                        |
| 8       | 0.50                                             | 55.00                                                | 10.00                                                        |
| 9       | 1.01                                             | 75.81                                                | 4.05                                                         |
| 10      | 2.49                                             | 34.19                                                | 15.95                                                        |
| 11      | 1.01                                             | 75.81                                                | 15.95                                                        |
| 12      | 1.75                                             | 20.00                                                | 10.00                                                        |
| 13      | 1.75                                             | 55.00                                                | 0.00                                                         |
| 14      | 1.01                                             | 34.19                                                | 15.95                                                        |
| 15      | 2.49                                             | 34.19                                                | 4.05                                                         |
| 16      | 1.75                                             | 55.00                                                | 10.00                                                        |
| 17      | 1.75                                             | 55.00                                                | 10.00                                                        |

**Supplement Table S2.** Primer sequences for RT-PCR analyses

| Primer name    | Sequence (from 5' to 3')         | Product size (bp) |
|----------------|----------------------------------|-------------------|
| iNOS           |                                  |                   |
| Forward        | CACTT GGAGT TCACC CAGT           | 169               |
| Reverse        | ACCAC TCGTA CTTGG GATGC          |                   |
| COX-2          |                                  |                   |
| Forward        | CAGGT CATTG GTGGA GAGGT GTATC    | 484               |
| Reverse        | CCAGG AGGAT GGAGT TGTTG TAGAG    |                   |
| TNF- $\alpha$  |                                  |                   |
| Forward        | CCTGT AGCCC ACGTC GTAGC          | 70                |
| Reverse        | TTGAC CTCAG CGCTG ACTTG          |                   |
| IL-6           |                                  |                   |
| Forward        | TTGGG ACTGA TGTTG TTGAC A        | 200               |
| Reverse        | TCATC GCTGT TGATA CAATC AGA      |                   |
| IL-1 $\beta$   |                                  |                   |
| Forward        | CTACA GGCTC CGAGA TGAAC AAC      | 79                |
| Reverse        | CTACA GGCTC CGAGA TGAAC AAC      |                   |
| IL-13          |                                  |                   |
| Forward        | CCTTA AGGAG CTTAT TGAGG AGCTG AG | 280               |
| Reverse        | CAGTT GCTTT GTGTA GCTGA GCAG     |                   |
| IL-4           |                                  |                   |
| Forward        | GAATA TACCA GGAGC CATAT C        | 385               |
| Reverse        | CTCAG TACTA CGAGT AATCC A        |                   |
| IL-10          |                                  |                   |
| Forward        | CAGCC GGGAA GACAA TAACT G        | 67                |
| Reverse        | CCGCA GCTCT AGGAG CATGT          |                   |
| $\beta$ -actin |                                  |                   |
| Forward        | TGGAA TCCTG TGGCA TCCAT GAAAC    | 349               |
| Reverse        | TAAAA CGCAG CTCAG TAACA GTCCG    |                   |

**Supplementary Figure S1.** Cell viability assay to determine the optimal AA concentration. The MTT assay was performed in RAW264.7, cells after four different doses (10, 20, 40, and 80  $\mu$ M) of AA. All values in the results are presented as mean  $\pm$  standard deviation (SD). \* indicates statistical significance compared with the non-treated group.

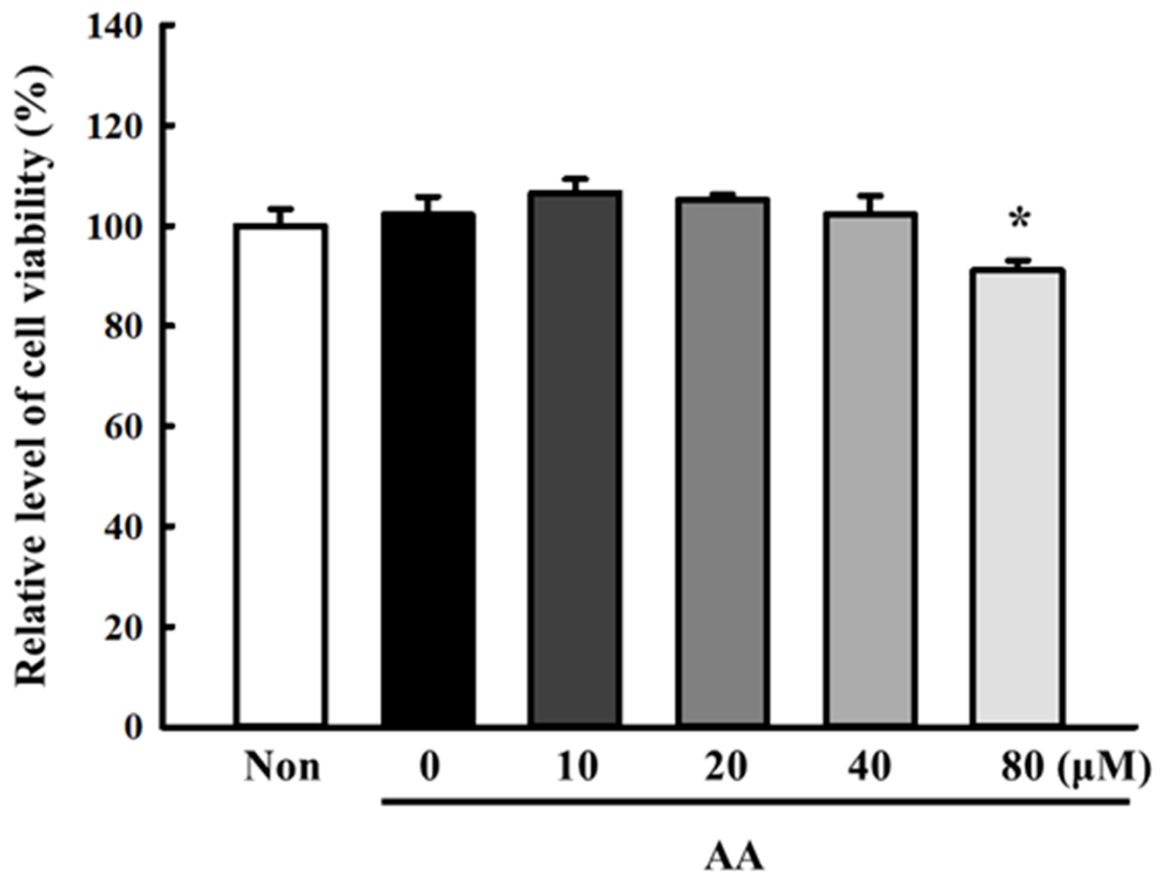

**Supplementary Figure S2.** Cell viability assay to determine the optimal LPS concentration. MTT assay was performed in RAW264.7 cells after four different doses (0.25, 0.5, 1, and 2  $\mu\text{g/mL}$ ) of LPS. All values in the results are presented as mean  $\pm$  standard deviation (SD). \* indicates statistical significance compared to the non-treated group.

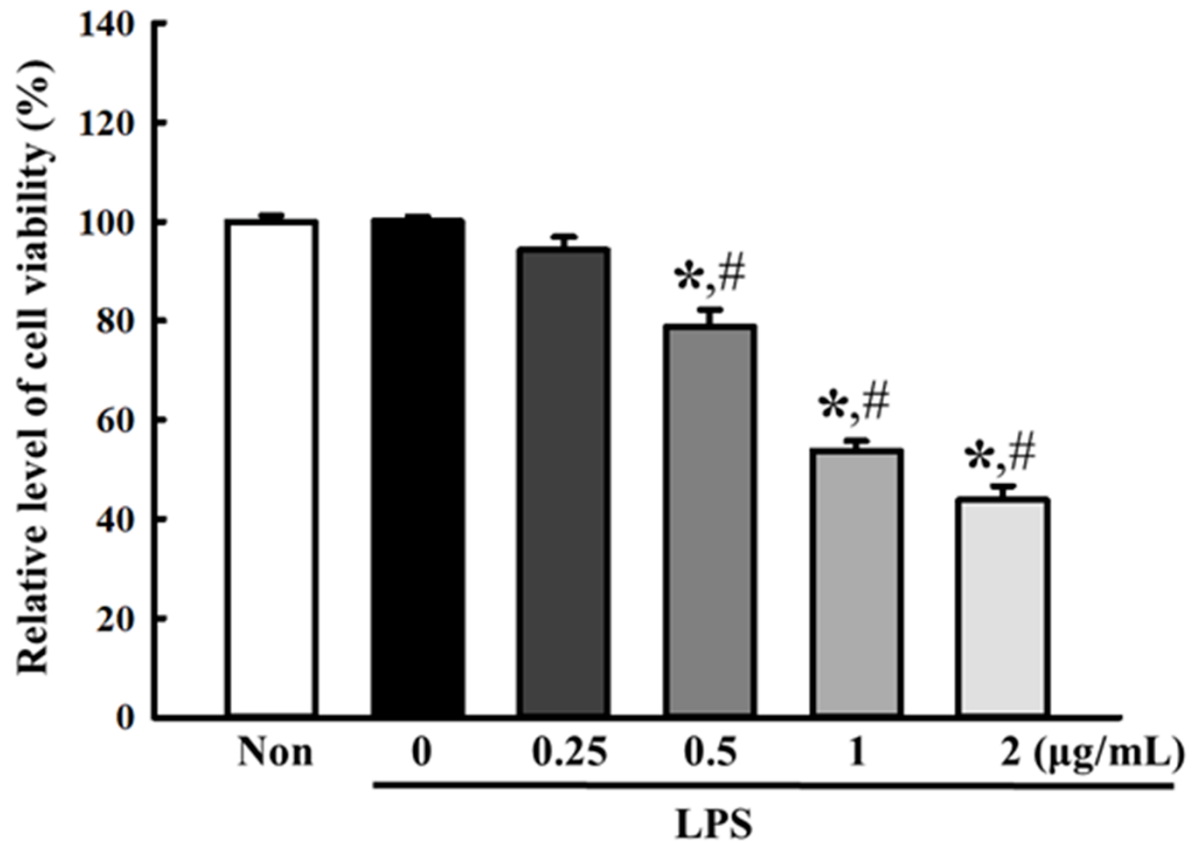

**Supplementary Figure S3.** The NO concentration was used to determine the optimal concentration of LPS. MTT assay was performed in RAW264.7 cells after four different doses (0.25, 0.5, 1, and 2  $\mu\text{g/mL}$ ) of LPS. All values in the results are presented as mean  $\pm$  standard deviation (SD). \* indicates statistical significance compared to the non-treated group.

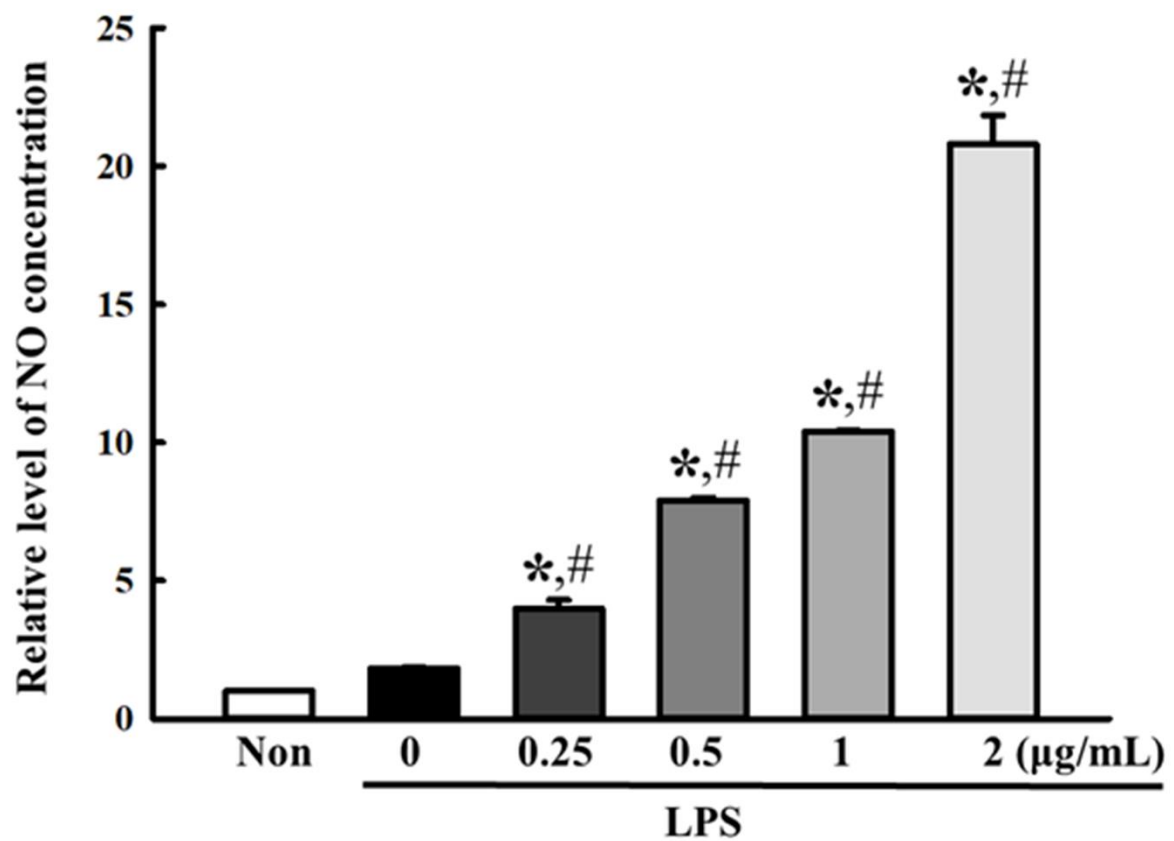

Supplement: s1 [file s1]
